# Supplementary material for: The Implications of the Vitamin D Metabolite Diagnostic Ratio in the Assessment of Patients With Idiopathic Hypercalciuria
Source: PubMed Central journal article supplement — Kidney Int Rep. 2024 Jan 8;9(4):743–5. doi: 10.1016/j.ekir.2024.01.012 (PMC11101799; doi:10.1016/j.ekir.2024.01.012), 2024-01-08
Supplement: mmc1.pdf [file mmc1.pdf]

#### Supplementary references

S1 Santos, A.C.S., Lima, E.M., Penido, M.G.M.G. et al. Plasma and urinary levels of cytokines in patients with idiopathic hypercalciuria. *Pediatr Nephrol* 27, 941–948 (2012). doi:10.1007/s00467-011-2094-4

S2 Halbritter J, Baum M, Hynes AM, et al. Fourteen Monogenic Genes Account for 15% of Nephrolithiasis/Nephrocalcinosis. *J Am Soc Nephrol*. 2015;26(3):543-551. doi:10.1681/ASN.2014040388

S3 Nesterova G, Malicdan MC, Yasuda K, et al. 1,25-(OH)<sub>2</sub>D-24 Hydroxylase (CYP24A1) Deficiency as a Cause of Nephrolithiasis. *Clin J Am Soc Nephrol*. 2013;8(4):649-657. doi:10.2215/CJN.05360512

S4 Ketha H, Kumar R, Singh RJ. LC-MS/MS for Identifying Patients with CYP24A1 Mutations. *Clin Chem*. 2016;62(1):236-242. doi:10.1373/clinchem.2015.244459

S5 Santoro G, Lombardi G, Andreola S, et al. Association analysis of 10 candidate genes causing Mendelian calcium nephrolithiasis in the INCIPE study: a South European general population cohort. *Clin Kidney J*. 2023;16(3):521-527. doi:10.1093/ckj/sfac225
